# Supplementary material for: Selective Removal of Hemicellulose by Diluted Sulfuric Acid Assisted by Aluminum Sulfate
Source: MDPI journal article supplement (doi:10.3390/molecules29092027), 2024-04-28
Supplement: s1 [file s1]

# Selective removal of hemicellulose by diluted sulfuric acid as-sisted by aluminum sulfate

Jiang Huabin<sup>1</sup>, Zeng Lei<sup>1</sup>, Nie Jiaqi<sup>2</sup>, Zhu Fei<sup>1</sup>, Gao Zhongwang<sup>1</sup>, Zhang Aiping<sup>1\*</sup>, Xie Jun<sup>1\*</sup>, Chen Yong<sup>1</sup>

1 Institute of Biomass Engineering, Key Laboratory of Energy Plants Resource and Utilization, Ministry of Agriculture and Rural Affairs, Guangdong Engineering Technology Research Center of Agricultural and Forestry Biomass, South China Agricultural University, Guangzhou 510642, China

2 College of Materials and Energy, South China Agricultural University, Guangzhou 510642, China

\* Author to whom correspondence should be addressed

Table S1 Hemicellulose was removed by different pretreatment techniques

| Pretreatment method                              | Raw materials  | Condition                                | Hemicellulose removal | Reference  |
|--------------------------------------------------|----------------|------------------------------------------|-----------------------|------------|
| Mannitol, oxalic acid                            | Poplar         | OA 7.0%, MA 7.0%<br>150 °C, 60 min       | 79.08%                | [15]       |
| Mandelic acid                                    | Eucalyptus     | 6.0 wt%, 150 °C,<br>80 min               | 83.66%                | [16]       |
| Vanillic acid                                    | Eucalyptus     | 8.0%, 170 °C, 80 min                     | 88.59%                | [10]       |
| Tetramethylammonium hydroxide (TMAH)             | Poplar         | 25wt%                                    | 66.4%                 | [41]       |
| Benzoic acid (BZA)                               | Poplar         | 2%, 160 °C, 0.75 h                       | 93.1%                 | [42]       |
| Saturated steam                                  | Wheat straw    | 180 °C, 10 bar,<br>35 min                | 63%                   | [12]       |
| Microwave, choline chloride/p-TsOH               | Reed           | ChCl/p-TsOH(1:2),<br>100 °C, 30 min      | 89.41%                | [43]       |
| Press, Hydrothermal                              | Kraft pulping. | 155 °C, 3MPa                             | 70.63%                | [44]       |
| Aluminum sulfate, H <sub>2</sub> SO <sub>4</sub> | Straw stover   | 160 °C, 1.5wt%E520,<br>0.7 wt%DA, 40 min | 98.05%                | This study |

Table S2 Effect of dilute acid sulfuric acid pretreatment on chemical composition change

| Pretreatment conditions |            |                 | Solid recovery (%) | Component content (%) |       |        |
|-------------------------|------------|-----------------|--------------------|-----------------------|-------|--------|
| Temperature (°C)        | Time (min) | Concentration % |                    | Glucan                | Xylan | Lignin |
| Corn stover             |            |                 | —                  | 36.95                 | 23.61 | 18.04  |
| 100                     | 30         | 0.5             | 84.68              | 42.95                 | 21.86 | 20.14  |
| 110                     |            |                 | 73.76              | 46.79                 | 15.73 | 21.36  |
| 120                     |            |                 | 66.71              | 49.37                 | 11.81 | 22.24  |
| 130                     |            |                 | 62.96              | 55.21                 | 7.94  | 23.91  |
| 140                     |            |                 | 57.60              | 58.39                 | 4.63  | 24.77  |
| 140                     | 20         | 0.5             | 61.86              | 55.46                 | 6.77  | 23.85  |
|                         | 30         |                 | 59.14              | 56.90                 | 6.44  | 23.17  |
|                         | 40         |                 | 59.53              | 57.31                 | 5.36  | 24.34  |
|                         | 50         |                 | 58.34              | 57.79                 | 4.56  | 25.08  |
| 140                     | 40         | 0.5             | 56.85              | 60.39                 | 4.46  | 26.85  |
|                         |            | 0.7             | 55.97              | 59.62                 | 3.67  | 27.02  |
|                         |            | 0.9             | 54.40              | 56.54                 | 2.37  | 27.42  |
|                         |            | 1.0             | 53.83              | 48.87                 | 1.31  | 28.40  |
|                         |            | 1.2             | 52.23              | 41.19                 | 0.77  | 28.47  |

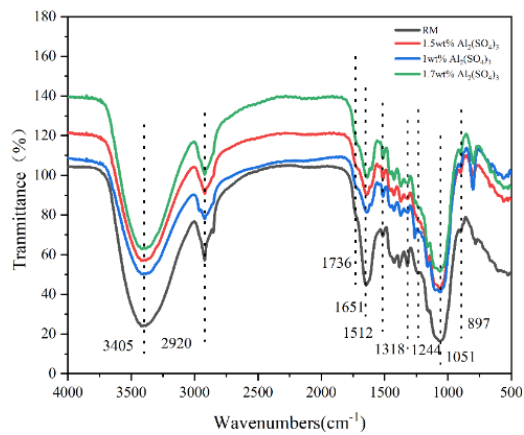

Fig. S1 FTIR of RM and different pretreatment samples

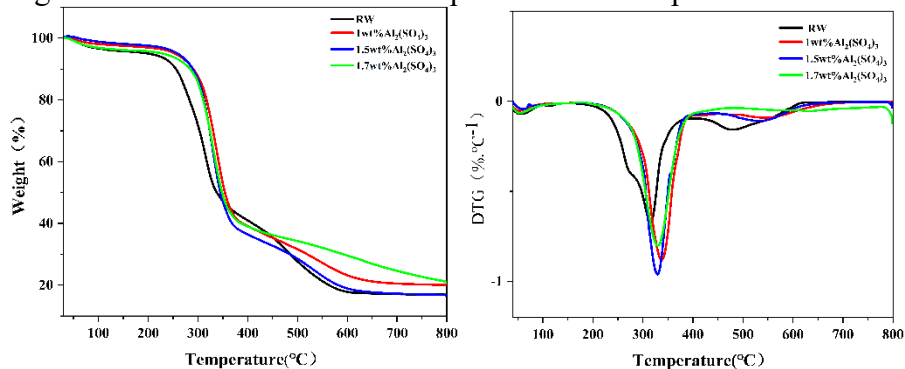

Fig.S2 TG of RM and different pretreatment samples

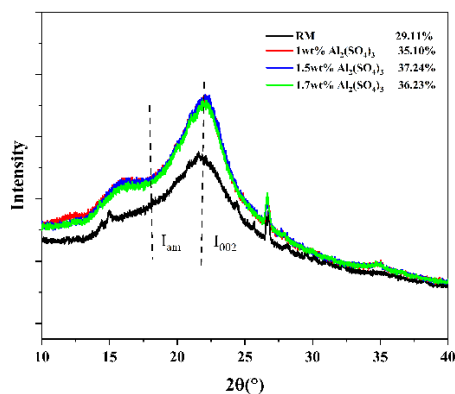

Fig.S3 XRD of RM and different pretreatment samples

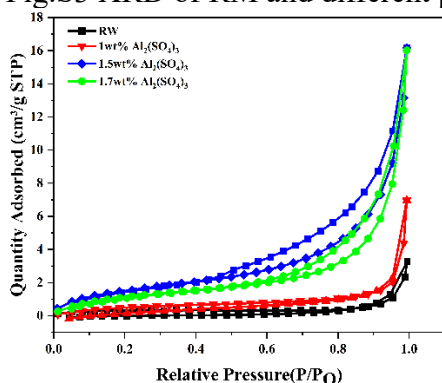

Fig.S4 BET of RM and different pretreatment samples

Table S3 The result of BET data

|        | BET Surface Area (m <sup>2</sup> /g) | Pore Volume (dm <sup>3</sup> /g) | Pore Size(nm) |
|--------|--------------------------------------|----------------------------------|---------------|
| RM     | 1.1979                               | 5.082                            | 26.6296       |
| 1wt%   | 2.1820                               | 10.768                           | 24.3572       |
| 1.5wt% | 5.9851                               | 25.019                           | 12.7201       |
| 1.7wt% | 4.6489                               | 24.776                           | 18.0721       |

Six chromatograms of glucose and xylose standard samples, 1 chromatogram of raw material components of corn stalk and 2 chromatographs of pretreated samples were presented. The peak retention times of glucose and xylose were 20.1 and 21.5, respectively.

0.3 g/L glucose and xylose(standards mixture)

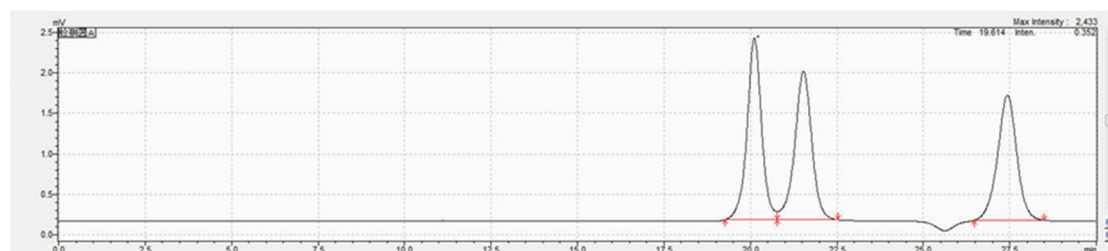

The raw material before pretreatment (Corn stalk)

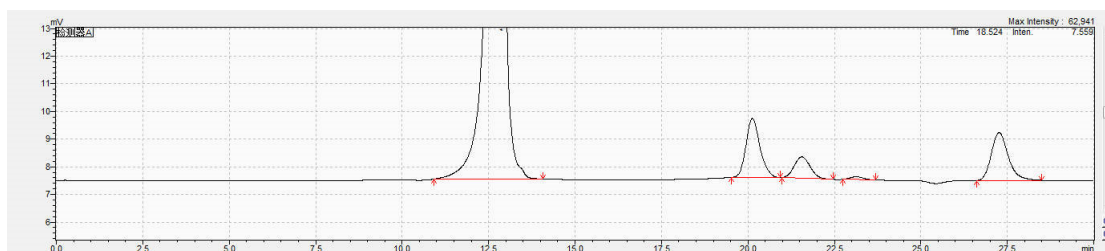

The sample 1 after pretreatment

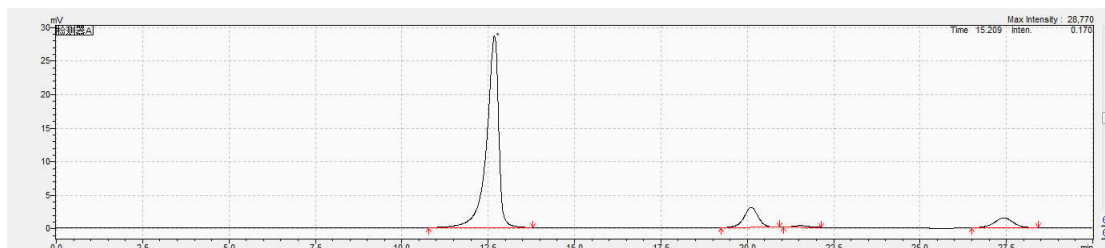

Standard curve chromatograms of inhibitors and sample chromatograms were presented. The peak retention times of formic acid, acetic acid, HMF and furfural were 19.85, 21.69, 53.14 and 80.01, respectively.

0.3 g/L formic acid, acetic acid, HMF and furfural (standards mixture)

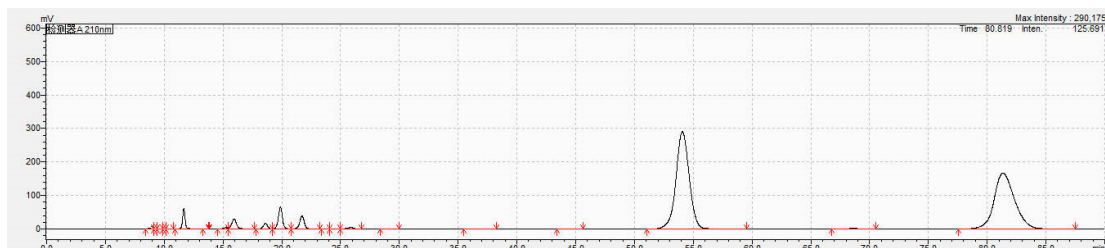

Sample1 after pretreatment

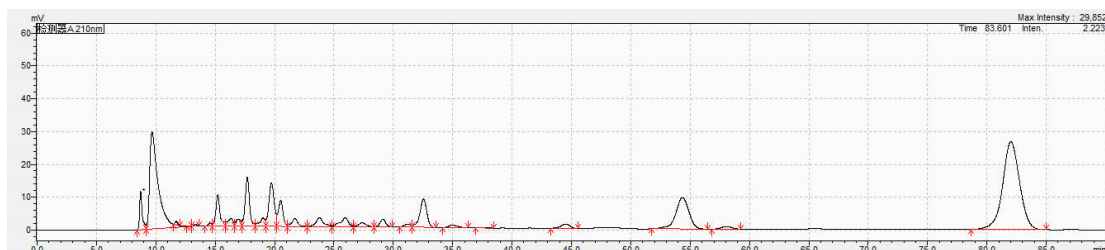

## References:

- [10] Wang, F.; Liu, B.; Cao, W.; Liu, L.; Zeng, F.; Qin, C.; Liang, C.; Huang, C.; Yao, S. Novel dual-action vanillic acid pretreatment for efficient hemicellulose separation with simultaneous inhibition of lignin condensation. *Bioresour. Technol.* **2023**, *385*, 129416. <https://doi.org/10.1016/j.biortech.2023.129416>.
- [15] Liu, L.; Liu, B.; Li, X.; Wang, Z.; Mu, L.; Qin, C.; Liang, C.; Huang, C.; Yao, S. Mannitol assisted oxalic acid pretreatment of poplar for the deconstruction and separation of hemicellulose. *Ind. Crop. Prod.* **2023**, *200*, 116811. <https://doi.org/10.1016/j.indcrop.2023.116811>.

- [16] Wang, S.; Liu, B.; Liang, J.; Wang, F.; Bao, Y.; Qin, C.; Liang, C.; Huang, C.; Yao, S. Rapid and mild fractionation of hemicellulose through recyclable mandelic acid pretreatment. *Bioresour. Technol.* **2023**, *382*, 129154. <https://doi.org/10.1016/j.biortech.2023.129154>.
- [41] Tian, R.; Zhu, B.; Hu, Y.; Liu, Q.; Bian, J.; Li, M.; Ren, J.; Peng, F. Selectively fractionate hemicelluloses with high molecular weight from poplar thermomechanical pulp by tetramethylammonium hydroxide. *International Journal of Biological Macromolecules* **2024**, *254*, doi:10.1016/j.ijbiomac.2023.127499.
- [42] Li, L.; Wan, Q.; Lu, Y.; Xia, L.; Xu, J.; Gou, J. Benzoic acid catalyzed production of xylose and xylooligosaccharides from poplar. *Industrial Crops and Products* **2024**, *213*, doi:10.1016/j.indcrop.2024.118460.
- [12] Parsin, S.; Kaltschmitt, M. Processing of hemicellulose in wheat straw by steaming and ultrafiltration – A novel approach. *Bioresource Technology* **2024**, *393*, doi:10.1016/j.biortech.2023.130071.
- [43] Xia, Q.; Zhang, L.; Zhan, P.; Tong, Z.; Qing, Y.; He, J.; Wu, Z.; Wang, H.; Shao, L.; Liu, N. Combination of microwave with acid deep eutectic solvent pretreatment for reed (*Phragmites australis*) fractionation. *Renewable Energy* **2024**, *225*, doi:10.1016/j.renene.2024.120286.
- [44] Sun, Q.; Wang, B.; Huang, H.; Ma, C.-Y.; Ma, Y.; Shen, X.; Cao, X.; Sun, Z.; Zhang, L.; Yuan, T.-Q. Pressure-assisted hydrothermal pretreatment for biorefinery to enhance pulp production. *Chemical Engineering Journal* **2024**, *487*, doi:10.1016/j.cej.2024.150758.
